# Supplementary material
Source: PubMed Central journal article supplement (PMC3400746)

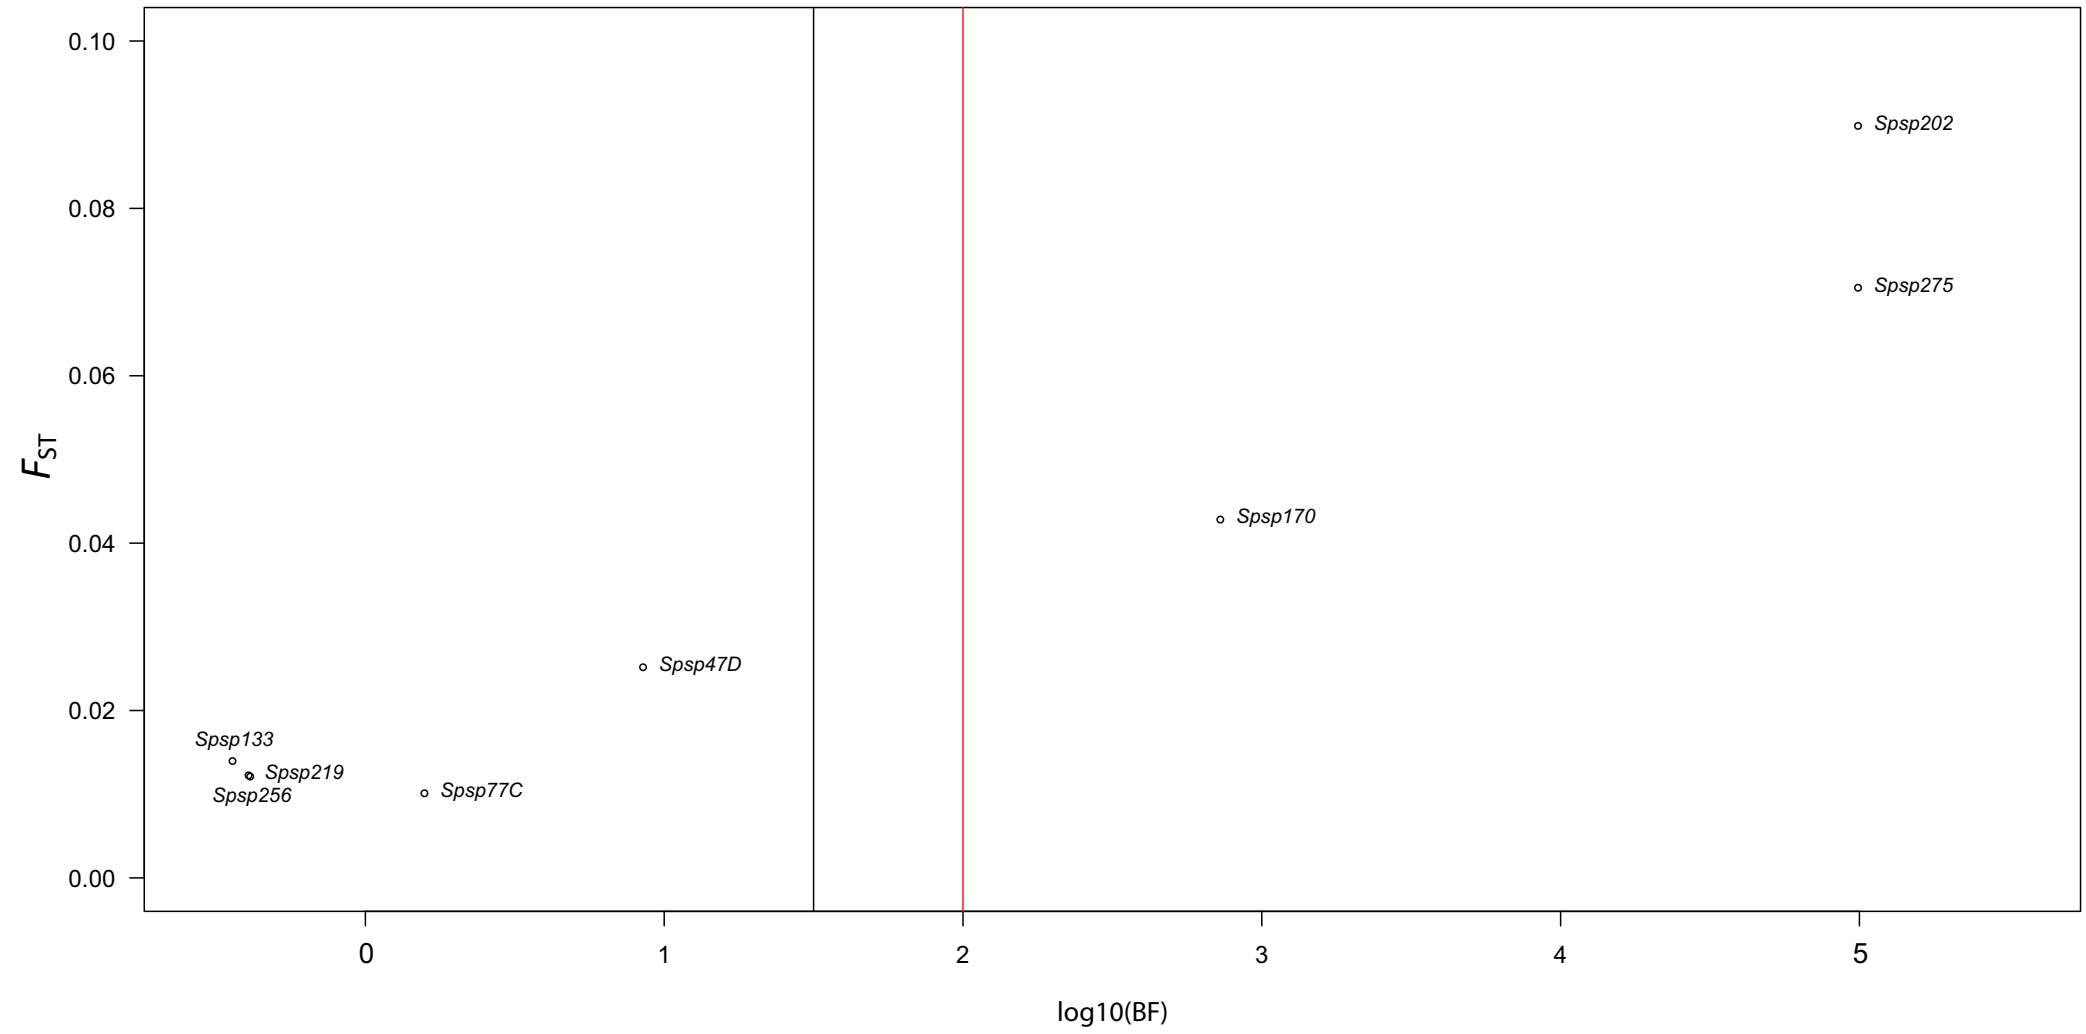

Supplement: hdy201218x5.pdf [file hdy201218x5.pdf]

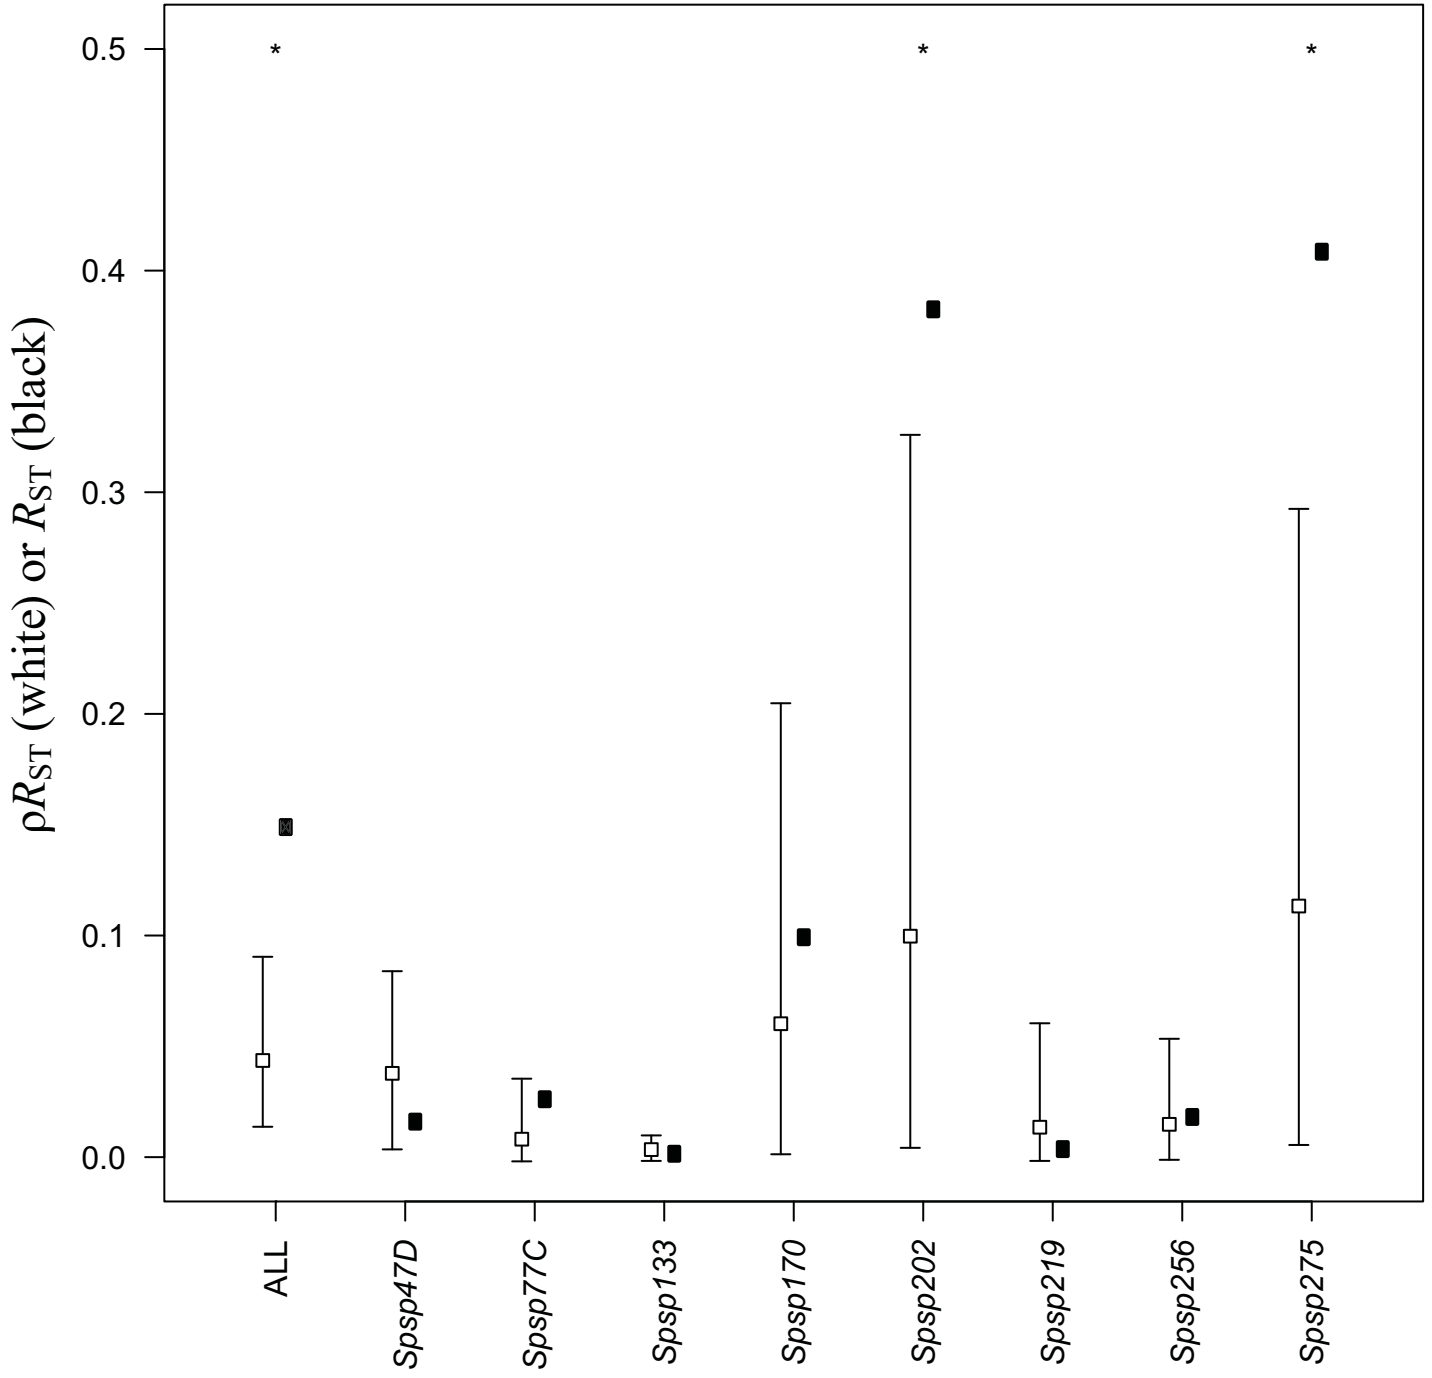

Supplement: hdy201218x7.pdf [file hdy201218x7.pdf]
